# Supplementary material
Source: Springer Nature journal article supplement (https://www.springermedizin.de/resource/supplementary/12890_2013_408_MOESM1_ESM.pdf/9505150)
Supplement: MOESM1 [file 9505150]

Screened for eligibility  
(age 45-85 years)

(n = 626)

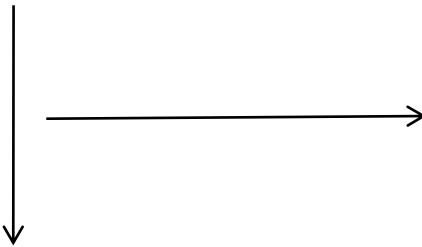

Eligible participants

(n = 378)

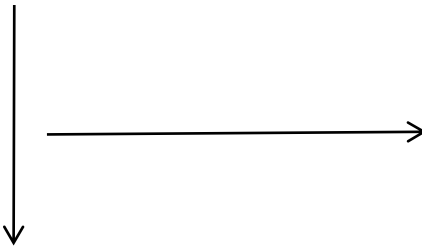

Data available for analysis

(n = 257)

Excluded (n = 248)

- Unable to do spirometry (n = 93)
- Unable to read CAT questionnaire (n = 32)
- Active respiratory disorder (such as pneumonia, diffuse bronchiectasis, interstitial lung disease etc.) (n = 78)
- Declined to participate (n = 45)

Excluded (n = 121)

- No airflow obstruction by GOLD criteria\*
